1 RESEARCH PAPER

2 **Chicory demonstrates substantial water**  
3 **uptake from below 2 m, but still did not**  
4 **escape topsoil drought**

5  
6 Camilla Ruø Rasmussen (crr@plen.ku.dk, +45 35 32 08 71)<sup>1\*</sup>, Kristian Thorup-Kristensen  
7 (ktk@plen.ku.dk)<sup>1</sup> and Dorte Bodin Dresbøll (dbd@plen.ku.dk)<sup>1</sup>

8  
9 <sup>1</sup> Department of Plant and Environmental Sciences, University of Copenhagen, Taastrup, Denmark

10 \* Corresponding author

11  
12 Submission date: 12 December 2018

13  
14 This manuscript contains 2 tables and 8 figures. All greyscale

15 Word count: 6494

16 **Running title:** Deep water uptake by chicory

17

18 **Highlight:** Chicory water uptake from below 2 m contributes significantly to chicory water use.  
19 Still, chicory succumbs to topsoil drought-induced growth reduction.

20

21 **Abstract**

22 Deep-rooted agricultural crops can potentially utilize deep-water pools and thus reduce periods  
23 where growth is water limited. Chicory (*Cichorium intybus* L.) is known to be deep-rooted, but the  
24 contribution of deep roots to water uptake under well-watered and drought conditions by the  
25 deep root system has not been studied. The aim of this study was to investigate whether chicory  
26 reached 3 m depth within a growing season and demonstrated significant water uptake from the  
27 deeper part of the root zone. We tested if chicory exposed to either topsoil drought or resource  
28 competition from shallow-rooted species would increase deep water uptake in compensation for  
29 reduced topsoil water uptake. We grew chicory in 4 m deep soil filled rhizotrons and found that  
30 the roots reached 3 m towards the end of the growing season. We found that water uptake from  
31 below 1.7 m in 2016 and 2.3 m in 2017 contributed significantly to chicory water use. However,  
32 neither drought nor intercropping increased the deep water uptake. We conclude that chicory  
33 benefits from being deep-rooted during drought events, yet it still succumbs to drought-induced  
34 growth reduction.

35

36 **Key-words:** *Cichorium intybus* L., Deep root growth, Deep water uptake, Drought resistance,  
37 Intercropping, Yield loss, Deuterium, hydrological tracer,  $^2\text{H}$ , TDR sensor

38

39 **Introduction**

40 Minimizing water limitation during growth of agricultural crops is crucial to unlocking full yield  
41 potential. Crop yield losses vary according to the timing and severity of water limitations, but even  
42 short-term drought can be a major cause of yield losses (Zipper *et al.*, 2016). Deep-rooted crops  
43 can potentially utilize otherwise inaccessible deep-water pools and thus reduce periods where  
44 crop production is water limited. In areas where precipitation is sufficient to rewet the soil profile

45 during a wet season, shallow-rooted crops might still experience water limitation during the  
46 growing season, as they do not have access to the water stored deeper in the profile.

47 The potential influence of deep roots on water uptake has been highlighted numerous times  
48 (e.g. Canadell *et al.*, 1996; Lynch and Wojciechowski, 2015), still, information about the actual  
49 contribution of deep roots to water uptake remains scarce. Maeght *et al.* (2013) suggest that this  
50 is related to the absence of tools to measure deep root activity with sufficient throughput and  
51 standardization at affordable costs, and to the widespread assumption that as deep roots only  
52 represent a small fraction of the overall root system their contribution to root system function is  
53 marginal. It has also been questioned whether deep root growth under field conditions is too  
54 restricted by high soil strength, and unfavourable conditions such as e.g. hypoxia, acidity, and low  
55 nutrient availability, to substantially benefit the crop (Lynch and Wojciechowski, 2015; Gao *et al.*,  
56 2016).

57 Whereas some soils definitely restrict deep root growth, other soils have shown to allow  
58 roots to grow in the deeper soil layers (Sponchiado *et al.*, 1989; Thorup-Kristensen and  
59 Rasmussen, 2015). In addition, even though the majority of the root biomass is found in the  
60 topsoil, deep roots can contribute significantly to water supply in crops, as there is little  
61 connection between root biomass and root activity (Mazzacavallo and Kulmatiski, 2015). Gregory  
62 *et al.* (1978) found that in the field, winter wheat had less than 5% of its root biomass below 1 m,  
63 and as long as the water supply was sufficient in the upper meter, the biomass reflected the water  
64 uptake well. However, when the topsoil dried, the roots between 1 and 2 m supplied the plants  
65 with up to 20% of the total water use. In a study conducted in an Amazonian tropical forest,  
66 Nepstad *et al.* (1994) found they would have underestimated the evapotranspiration by 60% in a  
67 dry year, had they not considered roots below 2 m.

68 Indirectly deeper root growth in crops has also been associated with deep-water uptake, as  
69 rooting depth has been shown to correlate positively with yield under drought in the field in e.g.  
70 wheat (Lopes and Reynolds, 2010), bean (Sponchiado *et al.*, 1989; Ho *et al.*, 2005), rice (Uga *et al.*,  
71 2013) and maize (Zhu *et al.*, 2010). In addition, modeling studies indicate that selection for deeper  
72 roots in grain crops could significantly improve deep-water acquisition and thereby yield in water  
73 deficit seasons (Manschadi A *et al.*, 2006; Lilley and Kirkegaard, 2011). Common to most of these  
74 studies is that deep root growth is considered to be in the range of 0.5 to 1.5 m. But several

75 agricultural crops have the capability to grow roots below 2 m or even deeper within a season  
76 (Canadell *et al.*, 1996; Ward *et al.*, 2003; Thorup-Kristensen, 2006; Rasmussen *et al.*, 2015), and  
77 thereby get access to an extra pool of water originating from wet season surplus precipitation  
78 stored in the soil. E.g. has Lucerne (*Medicago sativa* L.) shown to decrease the soil water content  
79 at a 5 m depth (Fillery and Poulter, 2006).

80 Hydrological isotope tracer techniques have over the last two decades become an  
81 increasingly popular tool to acquire information on temporal and spatial water use patterns in  
82 plants (e.g. Bishop and Dambrine, 1995; Peñuelas and Filella, 2003; Beyer *et al.*, 2016). Injection of  
83 tracer into specific soil depths has proven to be a precise method to detect the relative water  
84 uptake from the chosen depth (Kulmatiski *et al.*, 2010; Kulmatiski and Beard, 2013; Bachmann *et*  
85 *al.*, 2015; Beyer *et al.*, 2016). The hydrological tracer techniques utilize the fact that no isotopic  
86 fractionation against isotope forms of hydrogen or oxygen occurs during soil water uptake by  
87 roots (Wershaw *et al.*, 1966; Dawson and Ehleringer, 1991; Bariac *et al.*, 1994; Mensforth and  
88 Walker, 1996).

89 The anthropocentric discussion of the importance of deep root growth in crop production is  
90 put in perspective by the fact that some plant species have evolved the potential to grow deep  
91 roots. Under what circumstances is that strategy beneficial? In this study, we hypothesize that  
92 deep root growth can help plants escape topsoil drought. More specifically, we aimed at testing  
93 the following hypotheses, using chicory (*Cichorium intybus* L.) as an example plant: 1) Chicory can  
94 grow roots below 3 m within a growing season. 2) Chicory has a significant water uptake from the  
95 deeper part of the root zone despite low root intensity. 3) When chicory is exposed to either  
96 topsoil drought or resource competition from shallow-rooted species, deep water uptake  
97 increases in compensation for the decreased topsoil water uptake.

98 Chicory is commonly grown in pasture mixtures for animal fodder or as a cash crop to  
99 produce inulin (Meijer *et al.*, 1993). It is known to be able to reach at least 2.5 m (Thorup-  
100 Kristensen and Rasmussen, 2015). And to be drought resistant (Monti *et al.*, 2005; Skinner, 2008;  
101 Vandoorne *et al.*, 2012a). To test the hypotheses we grew chicory as a sole crop and in an  
102 intercropping with the two shallow-rooted species ryegrass (*Lolium perenne* L.) and black medic  
103 (*Medicago lupulina* L.) in 4 m deep rhizotrons. We allowed extensive root development before

104 imposing a drought, as our focus is on the potential of deep roots to acquire water and not on  
105 deep root growth during drought.

106

## 107 **Methods**

### 108 *Experimental facility*

109 We conducted the experiment in a semi-field facility at University of Copenhagen, Taastrup  
110 (55°40'08.5"N 12°18'19.4"E), Denmark and repeated it for the two consecutive seasons, 2016 and  
111 2017. We grew the crops in 4 m deep rhizotrons placed outside on a concrete foundation. The  
112 rhizotrons where 1.2 x 0.6 m rectangular columns constructed of steel frames. A waterproof  
113 plywood plate divided the rhizotrons lengthwise into an east- and a west-facing chamber with a  
114 surface area of 1.2 x 0.3 m. The rhizotrons stood on a north-south axis, narrow side facing towards  
115 one another (Figure 1). On the east- and the west facing fronts of the rhizotrons, 20 transparent  
116 acrylic glass panels allowed inspection of root growth at the soil-rhizotron interface on the entire  
117 surface. Each panel was 1.2 m wide and could be removed to allow direct access to the soil  
118 column. Every third panel was 0.175 m tall, and the rest were 0.21 m tall. We used the narrow  
119 panels for placement of equipment and soil sampling. The tall panels were used only for root  
120 observations. To avoid disturbance of root growth we never removed these panels during the  
121 experiment. All sides of the rhizotrons where covered in white plates of foamed PVC of 10 mm  
122 thickness to avoid light exposure of soil and roots. On the fronts, the foamed PVC plates were also  
123 divided into 20 panels. These were fixed in metal rails, allowing them to be slid off whenever we  
124 had to observe the roots (Figure 1). A wick in the bottom of the rhizotrons allowed water to drain  
125 out.

126 We used field soil as a growth medium. The bottom 3.75 m of the rhizotrons we filled with  
127 subsoil taken from below the plough layer at Store Havelse, Denmark (

128 Table 1). We filled the upper 0.25 m with a topsoil mix of sandy loam and fine sandy soil,  
129 half of each, both from the University's experimental farm in Taastrup, Denmark. To reach a soil  
130 bulk density comparable to field conditions we filled the soil into the rhizotrons stepwise at  
131 portions of approximately 15 cm depth and used a steel piston to compact each portion by  
132 dropping it several times on the soil. We filled the rhizotrons in August 2015 and did not replace  
133 the soil during the two years. At the time of the experiment, average subsoil bulk density was 1.6 g  
134 m<sup>-3</sup>, which is close to field conditions for this soil type.

135 We constructed rainout shelters to control water supply in the drought stress treatment. In  
136 2016, we covered the soil with a transparent tarpaulin that had a hole for each plant stem. The  
137 tarpaulins were stretched out and fixed with a small inclination to let the water run off. It turned  
138 out that this design failed to keep out water during intense precipitation events, which happened  
139 twice during the season. Thus in 2017, we designed barrel roof rainout shelters instead, using the  
140 same clear tarpaulin and placed them on all rhizotrons. The rain-out shelters were open in the  
141 ends and on the sides to allow air circulation but were wider than the rhizotrons to minimize  
142 precipitation during windy conditions.

143 We installed a drip irrigation pipe (UniRam™ HCNL) with a separate tap in each chamber.  
144 The pipe supplied 5 l hour<sup>-1</sup>, equivalent to 14 mm hour<sup>-1</sup> according to the surface area of the  
145 growth chambers.

146

#### 147 *Experimental design*

148 We had two treatments in 2016 and four in 2017. In both years we grew chicory (*Cichorium*  
149 *intybus* L., 2016: cv Spadona from Hunsballe frø. 2017: cv Chicoree Zoom F1 from Kiepenkerl) in  
150 monoculture under well-watered (WW) and drought stress (DS) conditions. In 2017, we also grew  
151 chicory intercropped with either ryegrass (*Lolium perenne* L.) or black medic (*Medicago lupulina*  
152 L.), both in a WW treatment. For chicory, we chose to work with a hybrid vegetable type cultivar in  
153 the second year to reduce variation among plants in size and development speed seen in the  
154 forage type used in the first year. In 2016, we transplanted four chicory plants into each chamber.  
155 In 2017, we increased to six plants per chamber. This was also an attempt to reduce within  
156 chamber variation. For the two intercropping treatments in 2017, we transplanted five ryegrass or  
157 black medic plants in between the six chicory plants.

158 For the 2016 season, chicory plants were sown in May 2015 in small pots in the greenhouse  
159 and transplanted into the rhizotrons 30 September. Despite our attempt to compact the soil,  
160 precipitation made the soil settle around 10% during the first winter. Therefore, 29 February 2016,  
161 we carefully dug up the chicory plants, removed the topsoil, filled in more subsoil to reach 3.75 m  
162 again before filling topsoil back in and replanting the chicory plants. A few chicory plants did not  
163 survive the replanting and in March, we replaced them with spare plants sown at the same time as  
164 the original ones and grown in smaller pots next to the rhizotrons. In 2017, we sowed chicory in  
165 pots in the greenhouse 11 April and transplanted them to the rhizotron chambers 3 May (Table 2).  
166 Chicory is perennial, it produces a rosette of leaves the first year and the second year it grows  
167 stems and flowers.

168 We grew all treatments in three randomized replicates. The six chambers not used for the  
169 experiment in 2016 but included in 2017 had also sunken during the 2015/2016 winter and the  
170 same procedure was used to top up soil in these chambers before transplanting the chicory plants.

171 In 2016, we fertilized all chambers with NPK 5-1-4 fertilizer equivalent to 100 kg N ha<sup>-1</sup>, half  
172 on 1 April and the other half on 21 June. In 2017, we fertilized all chambers 3 May and 1 June  
173 following the same procedure. Two chambers were accidentally over irrigated mid-June 2017 and  
174 we re-fertilized these 16 June.

175 In 2016, we pruned the plants at 0.5 m height, several times between 24 May and 12 July to  
176 postpone flowering and induce leaf and root growth.

177 We started drying out the DS treatments 26 June in 2016 and 13 July in 2017, where we  
178 stopped irrigation and mounted the rainout shelters. In 2016, we kept irrigating the WW  
179 treatments, whenever precipitation was considered insufficient to meet plant needs. In 2017,  
180 where the rainout shelters excluded precipitation in all chambers we kept irrigating all treatments  
181 apart from the DS to ensure sufficient water supply. However, we chose to supply the same  
182 amount of water in all the irrigated chambers, which led to different levels of soil water content.

183

#### 184 *Biomass and <sup>13</sup>C*

185 We harvested aboveground biomass 28 July in 2016 and 11 September in 2017. We dried the  
186 biomass at 80°C for 48 hours. The biomass was analysed for <sup>13</sup>C/<sup>12</sup>C ratio on an elemental analyser  
187 interfaced to a continuous flow isotope ratio mass spectrometer (IRMS) at the University of

188 California Stable Isotope Facility (Davis, California, USA). Isotope values are expressed in delta  
189 notation ( $\delta$ ) in per mill [‰] following the definition of Coplen (2011):

190

$$\delta = \frac{R_{sample}}{R_{standard}} - 1 \#(1)$$

191

192 where  $R_{sample}$  is the ratio of the less abundant to the more abundant isotope ( $^{13}\text{C}/^{12}\text{C}$ ) in the  
193 sample and  $R_{standard}$  the ratio in a standard solution. For  $\delta^{13}\text{C}$  the international standard Vienna  
194 PeeDee Belemnite ( $R_{standard} = 11180.2 \times 10^{-6}$ ) was used. Analytical precision ( $\sigma$ ) was 0.2‰.

195 The  $^{13}\text{C}/^{12}\text{C}$  ratio in plants is directly related to the average stomatal conductance during  
196 growth, as discrimination between  $^{12}\text{CO}_2$  and  $^{13}\text{CO}_2$  during photosynthesis is greatest when  
197 stomatal conductance is high. When stomates are partially or completely closed, a greater part of  
198 the  $\text{CO}_2$  inside the leaf is absorbed resulting in less fractionation and thereby higher  $\delta^{13}\text{C}$  values of  
199 the plant tissue (Farquhar and Richards, 1984; Farquhar *et al.*, 1989).

200

#### 201 *Root measurements*

202 We documented the development in root growth by taking photos of the soil-rhizotron interface  
203 through the transparent acrylic glass panels. For this purpose, we designed a “photo box” that  
204 could be slid on the metal rails in place of the foamed PVC panels, and thereby excluded the  
205 sunlight from the photographed area. We placed a light source consisting of two bands of LED’s  
206 emitting light at 6000 K in the photo box. We used a compact camera (Olympus Tough TG 860).  
207 For each 1.2 m wide panel we took four photos to cover the full width of the panel. We  
208 photographed the roots on 21 June and 18 July 2016 and 6 July, 16 August and 12 September  
209 2017, corresponding to the time of drought initiation in the DS treatment,  $^2\text{H}$  tracer injection (see  
210 below) and for 2017, harvest. In 2017, harvest was postponed until 20 days after the  $^2\text{H}$  tracer  
211 experiment, due to other tests running in the facility.

212 We recorded the roots using the line intersects method (Newman, 1966) modified to grid  
213 lines (Marsh, 1971; Tennant, 1975) to calculate root intensity, which is the number of root  
214 intersections  $\text{m}^{-1}$  grid line in each panel (Thorup-Kristensen, 2001). To make the counting process  
215 more effective we adjusted the grid size to the number of roots, i.e. we used coarser grids when  
216 more roots were present and finer grids for images with only a few roots. This is possible because



217 root intensity is independent of the length of gridline. We used four grid sizes: 10, 20, 40 and 80  
218 mm. To minimize the variance of sampled data we used grid sizes that resulted in at least 50  
219 intersections per panel (Ytting, 2015).

220

#### 221 *Soil water content*

222 We installed time-domain reflectometry sensors (TDR-315/TDR-315L, Acclima Inc., Meridian,  
223 Idaho) at three depths to measure volumetric water content (VWC) in the soil. In 2016, the  
224 sensors were installed at 0.5 and 1.7 m depth. In 2017, the sensors were installed at 0.5 and 2.3 m  
225 depth. Soil water content was recorded every 5 min in 2016 and every 10 min in 2017 on a  
226 datalogger (CR6, Campbell Scientific Inc, Logan, Utah). Discrepancies in measured VWC among the  
227 sensors at field capacity (FC) let us conclude that the sensors were precise but not particularly  
228 accurate, meaning that the change over time in VWC was reliable but not the measured actual  
229 VWC. We have therefore estimated a sensor reading for each sensor at FC and reported changes  
230 in VWC from FC. We estimated FC as the mean VWC over a 48-hour interval. In 2017, the  
231 measurement was made in the autumn after excess water from a heavy rainfall had drained away.  
232 In the autumn, there is little evaporation and no plant transpiration to decrease VWC below FC,  
233 making it an optimal time to estimate FC. We did not have data from autumn 2016, so instead, we  
234 estimated FC in early spring.

235

#### 236 *Water uptake*

237 We estimated water uptake from the VWC readings. We assume that water movement in the soil  
238 is negligible when VWC is below FC. Hence, the decrease in VWC can be interpreted as plant water  
239 uptake. Water uptake in  $\text{mm m}^{-1}$  soil column  $\text{day}^{-1}$  is therefore estimated as the mean decrease in  
240 VWC over a given time interval. We attempted to use intervals corresponding to the time of the  $^2\text{H}$   
241 tracer studies. In 2016, the interval was postponed a few days (Figure 4, Table 2), and in 2017,  
242 the time interval did not cover the first two days of the tracer study (Figure 5).

243 For the period from onset of drought to harvest 2017, we tested whether the daily water  
244 uptake in 2.3 m was affected by daily mean VWC in 0.5 m across all treatments. For this period,  
245 the VWC in 2.3 m was close to FC in all treatments and therefore unlikely to affect the water  
246 uptake. As transpiration demand is high at this time of the year and plants are large, we assumed

247 that topsoil water limitations would limit total water uptake unless it is balanced by an increased  
248 water uptake lower in the profile. We excluded days in which the chambers were irrigated and  
249 one day after irrigation events to exclude periods with large soil water movement.

250

251 *<sup>2</sup>H tracer*

252 We used <sup>2</sup>H labeled water injected into 2.3 m to trace water uptake from this depth. We mixed  
253 90% <sup>2</sup>H<sub>2</sub>O tracer with tap water 1:1, to achieve an enrichment of  $\delta$  5,665,651 ‰ and injected 100  
254 ml per chamber. We removed one of the acrylic panels in each chamber temporarily to allow  
255 tracer injection and distributed it over 100 injection points in the soil. The injections were made at  
256 two horizontal rows of each 10 equally distributed holes 5 cm above and below 2.3 m respectively.  
257 In each of these 20 holes, we injected 5 ml tracer distributed between five points: 5, 10, 15, 20 and  
258 25 cm from the horizontal soil surface. Tracer injection was made on 19 July 2016 and 15 August  
259 2017.

260 We captured the tracer signal by collecting transpiration water using plastic bags. For studies  
261 using tracers, collecting transpiration water is considered valid, as the tracers increase the  
262 enrichment level several orders of magnitudes, which make the fractionation negligible (Thorburn  
263 and Mensforth, 1993; Beyer *et al.*, 2016). We sampled the transpiration water 1 day before tracer  
264 injection as a control and 1, 2, 3, 4 and 6 days after in 2016, and 3 and 6 days after in 2017. We  
265 fixed a plastic bag over each plant with an elastic cord that minimized air exchange with the  
266 surroundings. Transpiration water condensed on the inside of the plastic bag, which was folded  
267 inwards under the elastic cord to create a gutter for the water drops. Plastic bags were mounted  
268 on the plants two hours before noon and removed at noon.

269 We removed the plastic bags one by one, shook them to unite the drops, and transferred  
270 each sample to a closed plastic beaker. Later we filtered the samples through filter paper to  
271 remove soil and debris contamination and transferred the samples to glass vials.

272 We collected water from all plants and in most cases mixed the individual plant samples  
273 before analysis, taking equal amounts of water from each sample. Day 2 in 2016 and day 6 in  
274 2017, we analysed the samples from each plant separately to get data on within chamber  
275 variation. For the control samples in 2017, we only collected water from two plants of each  
276 species per chamber. Single plant sample sizes varied from almost nothing to up to around 60 ml

277 in 2016 and 30 ml in 2017. The amount did not only reflect differences in transpiration rate, as it  
278 was impossible to avoid spill when removing the plastic bags, and therefore we choose to use  
279 equal amounts of water from each plant. For the control samples where variation was small, this is  
280 of minor importance. The relatively large sample sizes for most samples limited the concerns of  
281 fractionation due to evaporation during filtering and sample transfer.

282 The vials were shipped to Centre for Isotope Research, University of Groningen, The  
283 Netherlands and analysed for  $^2\text{H}$  on a continuous flow isotope ratio mass spectrometer (IRMS,  
284 Isoprime 10) combined with a chromium reduction system (Europa PyrOH, Gehre *et al.*, 1996).

285 Isotope values are expressed in delta notation ( $\delta$ ) as given in equation 1.  $R_{sample}$  is the  $^2\text{H}/^1\text{H}$   
286 ratio in the sample and  $R_{standard}$  for  $\delta ^2\text{H}$  is Vienna standard mean ocean water ( $R_{standard} \approx$   
287  $1/6412$ ). Analytical precision ( $\sigma$ ) was 0.7‰.

288 In order to identify whether tracer was present in a sample, we adapted the criteria  
289 proposed by Kulmatiski (2010). If a sample had a  $\delta ^2\text{H}$ -value at least two standard deviations  
290 higher than the control samples, tracer was assumed to be present.

291

## 292 *Statistics*

293 The effect of treatment on aboveground biomass of chicory, black medic and ryegrass was tested  
294 in a mixed effects one-way ANOVA. Separate harvest of single plants allowed the inclusion of  
295 chamber as random effect to account for the fact that the two intercropped species are not  
296 independent.

297 The effect of soil depth and treatment on root intensity was tested in a mixed effects two-  
298 way ANOVA. We included chamber as random effect to account for the fact that the different  
299 depths are not independent. To meet assumptions of normality, depths where at least one of the  
300 treatments had no roots in any of the replicates, were excluded from the model. Separate  
301 analyses were made for each date.

302 The effect of soil depth and treatment on water uptake during a given time interval was  
303 tested in a mixed effect three-way ANCOVA with time as covariate. In 2016, we excluded the  
304 sensors from one replicate of the DS treatment because water reached it during a cloudburst. In  
305 2017, we excluded two of the sensors in 0.5 m from the analysis, one in a chicory and ryegrass  
306 intercropping treatment and one in a chicory and black medic intercropping treatment. The first

307 due to noise in the readings and the second due to readings showing a pattern in VWC that did not  
308 resemble the pattern of any of the other sensors.

309 The effect of treatment and time on  $^2\text{H}$  concentration in transpiration water was tested in a  
310 mixed effects two-way ANOVA. We log-transformed the response variable to meet the  
311 assumptions of homoscedasticity. The first time point is from before tracer injection.

312 The effect of treatment on  $\delta^{13}\text{C}$  was tested in a one-way ANOVA. For 2017, the model is a  
313 mixed effects model because samples for each plant were analysed separately.

314 In all cases, separate analyses were made for each year. All models used met the  
315 assumptions of normality and homoscedasticity. Differences were considered significant at  $P$   
316  $<0.05$ . Data analyses were conducted in R version 3.4.4 (R Core team, 2018). Tukey test  $P$ -values  
317 for pairwise comparisons were adjusted for multiplicity, by single step correction to control the  
318 family-wise error rate, using the multcomp package (Hothorn *et al.*, 2008). For root intensity, we  
319 decided to control the family-wise error rate for each root depth. For the  $^2\text{H}$  concentration, we  
320 only made pairwise comparisons for the last date.

321

## 322 **Results**

323 Plants grew well both years, and as hypothesised, roots were observed below 3 m by the end of  
324 the growing season. Both the uptake of  $^2\text{H}$  tracer and sensor readings showed that chicory  
325 acquired water from 2.3 m. However, data does not suggest that a compensation takes place, i.e.  
326 deep water uptake was not increased to balance the decreased topsoil water uptake during  
327 drought.

328

### 329 *Biomass*

330 Plant development differed between the two experimental years. In 2016, the chicory plants were  
331 in their second growth year and went into the generative stage right from the start of the growing  
332 season. They started flowering ultimo May. Contrary in 2017, the chicory were in their first year of  
333 growth and stayed in the vegetative state. Aboveground biomass did not differ significantly  
334 between the two treatments in 2016 and was 6.52 and 6.85 ton/ha in the WW and DS treatment  
335 respectively. In 2017, chicory biomass was 4.65 and 3.64 ton/ha in the WW and DS treatment  
336 respectively, and 2.80 and 2.21 ton/ha when intercropped with either black medic or ryegrass.

337 Biomass of black medic and ryegrass was 5.89 and 7.68 ton/ha respectively. Both intercropping  
338 treatments significantly reduced chicory biomass compared to the WW treatment. Ryegrass  
339 produced significantly more biomass than black medic (Figure 2).

340

#### 341 *Root growth*

342 Root growth was alike in all four treatments; however intercropping decreased total RI down to  
343 around 2 m (only significant in few depths), except for 0.11 m depth, where the ryegrass  
344 treatment had a significantly higher RI than the other treatments. The month-long summer  
345 drought did not influence root intensity in any depths. In 2016, roots had reached 2 m at the time  
346 of drought initiation, which was 3.5 months after transplanting. A month later, at the time of  
347 tracer injection roots has reached below 3 m. In 2017, roots were observed almost to the bottom  
348 of the rhizotrons already at drought initiation, 2 months after transplanting. However, only few  
349 roots were present below 2 m. At the time of tracer injection, which was 3.5 months after  
350 transplanting root intensity had started to increase down to 2.5 m, and at harvest, 4.5 months  
351 after transplanting this was the case down to around 3 m (Figure 3).

352

#### 353 *Soil moisture and water uptake*

354 During the drought, 135 and 97 mm of water was excluded from the DS treatment in 2016 and  
355 2017 respectively. In 2016, the soil dried out gradually at both 0.5 m and 1.7 m depth in the DS  
356 treatment and in the WW treatment between the precipitation and irrigation events. As a result,  
357 the soil was drier in the DS than in the WW treatment in both of the recorded depths at time of  
358 the tracer experiment (Figure 4).

359 Despite that, the WW and the two intercropping treatments in 2017 received the same  
360 amount of water, less water reached the sensors at 0.5 m in the chicory and black medic  
361 intercropping. This indicates a drier soil above the sensors withholding more water in this  
362 treatment than in the other two irrigated treatments. At the time of the tracer experiment, soil  
363 water content under the chicory and black medic intercropping was equal to the DS treatment,  
364 whereas the two other treatments had a higher water content (Figure 5).

365 During the tracer rounds, chicory took up 3.7 and 2.3 mm water m<sup>-1</sup> soil column day<sup>-1</sup> from  
366 0.5 m in 2016 and 2017 respectively in the WW treatment. Both years the uptake from 0.5 m was

367 reduced by more than 50% in the DS treatment. In the WW treatment chicory, took up 1.9 mm  
368 water m<sup>-1</sup> from 1.7 m in 2016, whereas the uptake was only 0.44 mm water m<sup>-1</sup> soil column day<sup>-1</sup>  
369 from 2.3 m in 2017. In 2016, drought significantly reduced water uptake from 1.7 m, whereas no  
370 effect of drought was seen at 2.3 m in 2017. Common for both years was that the water uptake in  
371 the DS treatment was at the same level in the upper and lower depth.

372 Both intercropping treatments significantly reduced water uptake in 0.5 m, but no effect was  
373 seen at 2.3 m (Figure 6).

374 We did not find any effect of mean daily soil VWC in 0.5 m on water uptake in 2.3 m, giving  
375 no indication of a compensatory deep water uptake (Data not shown).

376

### 377 *<sup>2</sup>H enrichment*

378 Chicory took up <sup>2</sup>H tracer from 2.3 m both years (Figure 7). Two days after tracer application in  
379 2016, 21 out of 23 chicory plants demonstrated isotope ratios that were two standard deviations  
380 or more above controls. Six days after tracer application in 2017, it was 30 out of 64 chicory plants.  
381 No ryegrass or black medic plants indicated tracer uptake.

382 In 2016, the <sup>2</sup>H concentration in chicory plants in the DS treatment tended to be higher than  
383 in the WW treatment, but the difference was not significant. In 2017, no differences were seen in  
384 tracer uptake among chicory in the different treatments, but the <sup>2</sup>H enrichment of the black medic  
385 and ryegrass was significantly lower than that of the chicory plants they were intercropped with  
386 (Figure 7).

387

### 388 *δ<sup>13</sup>C enrichment*

389 In 2016, there was no effect of drought on the <sup>13</sup>C concentration of the chicory biomass. Likewise,  
390 there was neither an effect of drought nor intercropping with ryegrass in 2017. However,  
391 intercropping with black medic increased the <sup>13</sup>C concentration in chicory indicating that chicory  
392 was more drought stressed in this treatment than in any of the other treatments.

393

## 394 **Discussion**

395

### 396 *Deep root growth*

397 In accordance with our hypothesis, chicory demonstrated its capability to grow roots below 3 m  
398 and did so within 4.5 months. However, root intensity decreased markedly below 2 m in 2016 and  
399 below 2.5 in 2017. The root intensity below 2 m at drought initiation, 2.5 m at tracer injection and  
400 3.5 m at harvest in 2017 was very low and could be a result of roots from the 2016 crop still visible  
401 on the rhizotron surface. Studies covering a longer growing season have found extensive root  
402 growth in chicory down to 2.5 m, where equipment limitations prevented observations deeper  
403 down (Thorup-Kristensen, 2006; Thorup-Kristensen and Rasmussen, 2015). In the field, higher soil  
404 bulk density and other factors might restrict deep root growth, which is less likely in our semi-field  
405 facility with repacked soil (Gao *et al.*, 2016). However, we did use field soil with a soil bulk density  
406 of  $1.6 \text{ g m}^{-3}$ , which is comparable to field soils.

407         Apart from in the topsoil, both intercropping with ryegrass and black medic restricted total  
408 root intensity down to around 2 m. This has to be seen in the light of a total aboveground biomass  
409 that was twice as high as in the WW sole crop treatment. Observing that chicory biomass, on the  
410 other hand, was reduced to around one half when intercropped, suggests that both black medic  
411 and ryegrass had much lower root intensity below 0.3 m than sole cropped chicory and that the  
412 interspecific competition reduced both above- and belowground growth of chicory. Black medic  
413 and ryegrass are both shallow rooted and are unlikely to reach below 1 m (Thorup-Kristensen and  
414 Rasmussen, 2015), thus the deep roots observed in the intercropping treatments are assumed to  
415 be chicory roots.

416

#### 417 *Deep water uptake*

418 The sensors documented water uptake in all treatments from 1.7 m in 2016 and 2.3 m in 2017. In  
419 fact, the sensors showed that in 2016, chicory water uptake at 1.7 m was c. 30% of its water  
420 uptake at 0.5 m even when well-watered. In 2017, chicory water uptake at 2.3 m was c. 10% of its  
421 uptake at 0.5 m. In absolute terms, water uptake from 1.7 m in 2016 was in the range of  $1.5 \text{ mm}$   
422  $\text{m}^{-1} \text{ soil column day}^{-1}$  and from 2.3 m in 2017, it was  $0.5 \text{ mm m}^{-1} \text{ soil column day}^{-1}$ . Due to the small  
423 plots placed at a windy position at 4 m height, evapotranspiration must have been substantially  
424 higher than the potential evapotranspiration measured nearby of  $3.3$  and  $2.1 \text{ mm day}^{-1}$  for the  
425 same periods in 2016 and 2017 respectively. Even though we did not estimate the total

426 evapotranspiration, it is clear that the water uptake from the deeper part of the root zone  
427 substantially contributed to the total plant water balance.

428 The  $^2\text{H}$  tracer uptake by chicory from 2.3 m both years support the sensor based water  
429 uptake calculations. Furthermore, the tracer study confirmed that neither black medic nor  
430 ryegrass had roots deep enough to acquire water from 2.3 m. This is a clear example of resource  
431 complementarity in root competition in intercropping (Tilman *et al.*, 2001; Postma and Lynch,  
432 2012).

433

#### 434 *Response to water stress and intercropping*

435 Water uptake from 0.5 m was significantly reduced in the DS treatment compared to the WW  
436 treatment indicating that the soil water potential was low enough to limit plant water uptake in  
437 the DS treatment. Also, biomass was reduced in DS treatment, showing that plant growth was  
438 restricted. Contrary to our expectations, we did not find a higher water uptake neither at 1.7 m in  
439 2016 nor at 2.3 m in 2017 when plants were water limited in the topsoil. As biomass was only  
440 reduced by 5 and 21% in 2016 and 2017 respectively, whereas water uptake was reduced by 59  
441 and 74%, the reduction in water uptake cannot be explained by a reduced water need.

442 Although not significant, the  $^2\text{H}$  tracer study indicated a higher  $^2\text{H}$  concentration in the  
443 transpiration water in the DS than in the WW treatment in 2016. This suggests a higher relative  
444 water uptake from 1.7 m. A higher relative uptake from a certain depth can logically be explained  
445 by an increase in water uptake from the given depth, a decrease in water uptake somewhere else  
446 in the soil profile or a combination of both. As the water uptake based on the sensor calculations  
447 show a significantly lower water uptake from 0.5 m in the DS than in the WW treatment in 2016, it  
448 is likely that what we observed was the effect of decreased uptake in the topsoil.

449 We only observed a significant increase in  $^{13}\text{C}$  concentration in chicory when intercropped  
450 with black medic. Samples were taken from the total biomass, and not from plant parts developed  
451 during the drought, which might explain why the treatment effects were only captured in the  
452 black medic intercropping, where black medic appeared to have induced drought stress in chicory  
453 even before the onset of the drought stress we induced.

454 Intercropping reduced total root intensity in 0.5 m by more than 40%. Still, water uptake  
455 from this depth was only slightly decreased, indicating that the lower root intensity did not restrict



456 water uptake under well-watered conditions. Root density in upper soil layers of well-established  
457 crops does not correlate well with water uptake (Anblin and Tennant, 1987; Katayama *et al.*,  
458 2000), which can be explained by the high mobility of water in the soil, making a dense root  
459 system superfluous. Following the logic behind Walter's two-layer hypothesis (Walter, 1939, 1971;  
460 Walker and Noy-Meir, 1982), intercropping would lead to a vertical niche partitioning resulting in  
461 an increased water uptake by the deep-rooted chicory when intercropped with a shallow-rooted  
462 species. However, we did not observe an increase in deep water uptake.

463

#### 464 *Absence of a deep water compensation effect*

465 We suggest three possible explanations for why we did not observe the hypothesised increase in  
466 deep water uptake during drought or intercropping.

467 *1) The hydraulic resistance is too high to increase deep water uptake.* Theoretically, the  
468 ability of root systems to extract water from deep roots depends not only on root system depth  
469 but also on root system hydraulics (Javaux *et al.*, 2013). Root hydraulic conductivity limits the  
470 potential water uptake, and differs among species, but also among different roots in a root system  
471 (Ahmed *et al.*, 2018; Meunier *et al.*, 2018). The ability of a root system to compensate, i.e. extract  
472 water where it is easily available, for instance from deeper soil depths, is, therefore, a function of  
473 (1) the xylem conductance between the roots in the extraction zone and the root crown and (2)  
474 the radial root conductance in the wet zone. Compensation has been observed in chicory below  
475 0.6 m, but this was in a study allowing root growth down to only 1.5 m (Vandoorne *et al.*, 2012a).  
476 In our experiment, the xylem conductance might simply have been too low in the deeper part of  
477 the root zone to allow compensation, possibly because the deep soil measurements were made in  
478 a zone with a low density of young roots (McCully, 1995; Meunier *et al.*, 2018). However, chicory  
479 had 31% fewer roots in the black medic intercropping than in the WW treatment at 2.3 m, with no  
480 reduction in water uptake, not supporting such a relationship between root density and water  
481 uptake.

482 *2) Insufficient water supply in the topsoil induces root-to-shoot signalling causing stomatal*  
483 *closure, despite sufficient water supply in deeper soil layers.* Signals by phytohormones like Abscisic  
484 acid (ABA), produced when parts of the root system are under low water potential, might reduce  
485 plant transpiration and consequently root water uptake also from deeper depths by triggering

486 stomatal closure (Zhang and Davies, 1990*a,b*; Tardieu *et al.*, 1992; Dodd *et al.*, 2008). Split-root  
487 experiments, where one side of the root system is under low water potential, have found reduced  
488 stomata conductance, despite sufficient water supply (Blackman and Davies, 1985; Zhang and  
489 Davies, 1990*b*). However, experiments with vertical heterogeneity in soil water content yield  
490 ambiguous results (Puértolas *et al.*, 2015; Saradadevi *et al.*, 2016). The hormonal signalling during  
491 topsoil drying has not been tested for chicory. But chicory does show an isohydric behaviour,  
492 decreasing stomatal conductance and maintaining leaf water potential during moderate drought  
493 stress (Vandoorne *et al.*, 2012*b*).

494 *3) Deep water uptake compensation might have occurred, but was not captured in this*  
495 *experimental setup.* Water uptake compensation could have happened between or below the  
496 depths covered by the sensors. In 2016, VWC was not just lower in 0.5 m in the DS treatment  
497 compared to the WW treatment but also in 1.7 m, which could have impaired the water uptake  
498 from this depth too. Water could also have been confounded with water redistribution in the soil  
499 column, leading underestimation of water uptake in depths where water is moving to an  
500 overestimation in depths where water is moving from.

501 In summary, chicory can grow roots down to 3 m depth within 4.5 months and benefit from  
502 a significant water uptake from below 2 m both during well-watered and drought conditions. Our  
503 study highlights the benefit of deep root growth for crop water uptake, but questions whether  
504 further compensation in deep water uptake takes place when water is limited in the topsoil.  
505 Drought decreased aboveground biomass, showing that chicory was not able to escape the  
506 drought. A compensation might however be pronounced for other crop species or for crops which  
507 have had more time to establish a deep root system.

508

### 509 **Acknowledgments**

510 We thank statisticians Signe Marie Jensen and Helle Sørensen for advice regarding the statistical  
511 data analyses, technician Jason Allen Teem for his contribution to the experimental work, student  
512 helper Sunniva Melhus for counting roots and Engineer's assistant Sebastian Nielsen building the  
513 photo box and for constructive discussions on the design of it. All are affiliated with University of  
514 Copenhagen. We thank Villum Foundation (DeepFrontier project, grant number VKR023338) for  
515 financial support for this study.

## Reference

- Ahmed MA, Zarebanadkouki M, Meunier F, Javaux M, Kaestner A, Carminati A.** 2018. Root type matters: measurement of water uptake by seminal, crown, and lateral roots in maize. *Journal of Experimental Botany* **69**, 1199–1206.
- Anblin A, Tennant D.** 1987. Root length density and water uptake in cereals and grain legumes: how well are they correlated? *Aust. J. Agric. Res* **38**, 513–527.
- Bachmann D, Gockele A, Ravenek JM, Roscher C, Strecker T, Weigelt A, Buchmann N.** 2015. No evidence of complementary water use along a plant species richness gradient in temperate experimental grasslands. *PloS one* **10**, 1–14.
- Bariac T, Gonzalez-Dunia J, Tardieu F, Tessier D, Mariotti A.** 1994. Spatial variation of the isotopic composition of water ( $^{18}\text{O}$ ,  $^2\text{H}$ ) in organs of aerophytic plants: 1. Assessment under laboratory conditions. *Chemical Geology (Isotope Geoscience Section)* **115**, 307–315.
- Beyer M, Koeniger P, Gaj M, Hamutoko JT, Wanke H, Himmelsbach T.** 2016. A Deuterium-based labeling technique for the investigation of rooting depths, water uptake dynamics and unsaturated zone water transport in semiarid environments. *Journal of Hydrology* **533**, 627–643.
- Bishop K, Dambrine E.** 1995. Localization of tree water uptake in Scots pine and Norway spruce with hydrological tracers. *Canadian Journal of Forest Research* **25**, 286–297.
- Blackman PG, Davies WJ.** 1985. Root to shoot communication in maize plants of the effects of soil drying. *Journal of Experimental Botany* **36**, 39–48.
- Canadell J, Jackson RB, Ehleringer JR, Mooney HA, Sala OE, Schulze ED.** 1996. Maximum rooting depth of vegetation types at the global scale. *Oecologia* **108**, 583–595.
- Coplen TB.** 2011. Guidelines and recommended terms for expression of stable-isotope-ratio and gas-ratio measurement results. *Rapid Communications in Mass Spectrometry* **25**, 2538–2560.
- Dawson TE, Ehleringer JR.** 1991. Streamside trees that do not use stream water. *Nature* **350**, 335–337.
- Dodd IC, Egea G, Davies WJ.** 2008. Abscisic acid signalling when soil moisture is heterogeneous: decreased photoperiod sap flow from drying roots limits abscisic acid export to the shoots. *Plant, Cell & Environment* **31**, 1263–1274.
- Farquhar GD, Ehleringer JR, Hubick KT.** 1989. Carbon Isotope Discrimination and Photosynthesis. *Annual Review of Plant Physiology and Plant Molecular Biology* **40**, 503–537.

- Farquhar G, Richards R.** 1984. Isotopic composition of plant carbon correlates with water-use efficiency of wheat genotypes. *Australian Journal of Plant Physiology* **11**, 539–552.
- Fillery IRP, Poulter RE.** 2006. Use of long-season annual legumes and herbaceous perennials in pastures to manage deep drainage in acidic sandy soils in Western Australia. *Australian Journal of Agricultural Research* **57**, 297–308.
- Gao W, Hodgkinson L, Jin K, et al.** 2016. Deep roots and soil structure. *Plant, Cell & Environment* **39**, 1662–1668.
- Gehre M, Hoefling R, Kowski P, Strauch G.** 1996. Sample preparation device for quantitative hydrogen isotope analysis using chromium metal. *Annals of Chemistry* **68**, 4414–4417.
- Gregory PJ, McGowan M, Biscoe P V.** 1978. Water relations of winter wheat: 2. Soil water relations. *Journal of Agricultural Science* **91**, 103–116.
- Ho MD, Rosas JC, Brown KM, Lynch JP.** 2005. Root architectural tradeoffs for water and phosphorus acquisition. *Functional Plant Biology* **32**, 737–748.
- Hothorn T, Bretz F, Westfall P.** 2008. Simultaneous inference in general parametric models. *Biometrical Journal* **50**, 346–363.
- Javaux M, Couvreur V, Vanderborght J, Vereecken H.** 2013. Root water uptake: From three-dimensional biophysical processes to macroscopic modeling approaches. *Vadose Zone Journal* **12**, 1–16.
- Katayama K, Ito O, Adu-Gyamfi J, Rao T.** 2000. Analysis of relationship between root length density and water uptake by roots of five crops using minirhizotron in the semi-arid tropics. *Japan Agricultural Research Quarterly* **34**, 81–86.
- Kulmatiski A, Beard KH.** 2013. Root niche partitioning among grasses, saplings, and trees measured using a tracer technique. *Oecologia* **171**, 25–37.
- Kulmatiski A, Beard KH, Verweij RJT, February EC.** 2010. A depth-controlled tracer technique measures vertical, horizontal and temporal patterns of water use by trees and grasses in a subtropical savanna. *The New phytologist* **188**, 199–209.
- Lilley JM, Kirkegaard JA.** 2011. Benefits of increased soil exploration by wheat roots. *Field Crops Research* **122**, 118–130.
- Lopes MS, Reynolds MP.** 2010. Partitioning of assimilates to deeper roots is associated with cooler canopies and increased yield under drought in wheat. *Functional Plant Biology* **37**, 147–156.

**Lynch JP, Wojciechowski T.** 2015. Opportunities and challenges in the subsoil: pathways to deeper rooted crops. *Journal of Experimental Botany* **66**, 2199–2210.

**Maeght JL, Rewald B, Pierret A.** 2013. How to study deep roots - and why it matters. *Frontiers in Plant Science* **4**, 1–14.

**Manschadi A AM, Christopher JB, DeVoil PA, Hammer C GL.** 2006. The role of root architectural traits in adaptation of wheat to water-limited environments. *Functional Plant Biology* **33**, 823–837.

**Marsh BA.** 1971. Measurement of length in random arrangements of lines. *Journal of Applied Ecology* **8**, 265–267.

**Mazzacavallo MG, Kulmatiski A.** 2015. Modelling water uptake provides a new perspective on grass and tree coexistence. *PLoS ONE* **10**, 1–16.

**McCully M.** 1995. How do real roots work? Some new views of root structure. *Plant physiology* **109**, 1–6.

**Meijer WJM, Mathijssen EWJM, Borm GEL.** 1993. Crop characteristics and inulin production of jerusalem artichoke and chicory. In: Fuchs A, ed. *Inulin and Inulin-containing Crops*. Elsevier Science, 29–38.

**Mensforth LJ, Walker GR.** 1996. Root dynamics of *Melaleuca halmaturorum* in response to fluctuating saline groundwater. *Plant and Soil* **184**, 75–84.

**Meunier F, Zarebanadkouki M, Ahmed MA, Carminati A, Couvreur V, Javaux M.** 2018. Hydraulic conductivity of soil-grown lupine and maize unbranched roots and maize root-shoot junctions. *Journal of Plant Physiology* **227**, 31–44.

**Monti A, Amaducci MT, Pritoni G, Venturi G.** 2005. Growth, fructan yield, and quality of chicory (*Cichorium intybus* L.) as related to photosynthetic capacity, harvest time, and water regime. *Journal of Experimental Botany* **56**, 1389–1395.

**Nepstad DC, De Carvalho CR, Davidson EA, Jipp PH, Lefebvre PA, Negreiros GH, Da Silva ED, Stone TA, Trumbore SE, Vieira S.** 1994. The role of deep roots in the hydrological and carbon cycles of Amazonian forests and pastures. *Nature* **372**, 666–669.

**Newman EI.** 1966. A method of estimating total length of root in a sample. *Journal of Applied Ecology* **3**, 139–145.

**Peñuelas J, Filella I.** 2003. Deuterium labelling of roots provides evidence of deep water access and hydraulic lift by *Pinus nigra* in a Mediterranean forest of NE Spain. *Environmental and*

Experimental Botany **49**, 201–208.

**Postma JA, Lynch JP.** 2012. Complementarity in root architecture for nutrient uptake in ancient maize/bean and maize/bean/squash polycultures. *Annals of Botany* **110**, 521–534.

**Puértolas J, Conesa MR, Ballester C, Dodd IC.** 2015. Local root abscisic acid (ABA) accumulation depends on the spatial distribution of soil moisture in potato: implications for ABA signalling under heterogeneous soil drying. *Journal of Experimental Botany* **66**, 2325–2334.

**R Core team.** 2018. *A Language and Environment for Statistical Computing.*

**Rasmussen IS, Dresbøll DB, Thorup-Kristensen K.** 2015. Winter wheat cultivars and nitrogen (N) fertilization-effects on root growth, N uptake efficiency and N use efficiency. *European Journal of Agronomy* **68**, 38–49.

**Saradadevi R, Bramley H, Palta JA, Edwards E, Siddique KHM.** 2016. Root biomass in the upper layer of the soil profile is related to the stomatal response of wheat as the soil dries. *Functional Plant Biology* **43**, 62–74.

**Skinner RH.** 2008. Yield, root growth, and soil water content in drought-stressed pasture mixtures containing chicory. *Crop Science* **48**, 380–388.

**Sponchiado BN, White JW, Castillo JA, Jones PG.** 1989. Root growth of four common bean cultivars in relation to drought tolerance in environments with contrasting soil types. *Experimental Agriculture* **25**, 249–257.

**Tardieu F, Zhang J, Katerji N, Bethenod O, Palmer S, Davies WJ.** 1992. Xylem ABA controls the stomatal conductance of field-grown maize subjected to soil compaction or soil drying. *Plant, Cell and Environment* **15**, 193–197.

**Tennant D.** 1975. Test of a modified line intersect method of estimating root length. *Journal of Ecology* **63**, 995–1001.

**Thorburn PJ, Mensforth LJ.** 1993. Sampling water from alfalfa (*Medicago sativa*) for analysis of stable isotopes of water. *Communications in Soil Science and Plant Analysis* **24**, 549–557.

**Thorup-Kristensen K.** 2001. Are differences in root growth of nitrogen catch crops important for their ability to reduce soil nitrate-N content, and how can this be measured? *Plant and Soil* **230**, 185–195.

**Thorup-Kristensen K.** 2006. Effect of deep and shallow root systems on the dynamics of soil inorganic N during 3-year crop rotations. *Plant and Soil* **288**, 233–248.

- Thorup-Kristensen K, Rasmussen CRR.** 2015. Identifying new deep-rooted plant species suitable as undersown nitrogen catch crops. *Journal of Soil and Water Conservation* **70**, 399–409.
- Tilman D, Reich PB, Knops J, Wedin D, Mielke T, Lehman C.** 2001. Diversity and productivity in a long-term grassland experiment. *Science* **294**, 843–845.
- Uga Y, Sugimoto K, Ogawa S, et al.** 2013. Control of root system architecture by DEEPER ROOTING 1 increases rice yield under drought conditions. *Nature Genetics* **45**, 1097–1102.
- Vandoorne B, Beff L, Lutts S, Javaux M.** 2012*a*. Root water uptake dynamics of *Cichorium intybus* var. *sativum* under water-limited conditions. *Vadose Zone Journal* **11**.
- Vandoorne B, Mathieu A-S, Van den Ende W, Vergauwen R, Périlleux C, Javaux M, Lutts S.** 2012*b*. Water stress drastically reduces root growth and inulin yield in *Cichorium intybus* (var. *sativum*) independently of photosynthesis. *Journal of experimental botany* **63**, 4359–73.
- Walker B, Noy-Meir I.** 1982. Aspects of the stability and resilience of savanna ecosystems. *Ecology of tropical savannas*. Berlin: Springer, Berlin, 556–590.
- Walter H.** 1939. Grasland, savanne und busch der arideren teile Afrikas in ihrer ökologischen bedingtheit. *Jahrb Wiss Bot* 87. Berlin, 750–860.
- Walter H.** 1971. VI. Natural savannahs as a transition to the arid zone. In: Huntley BJ and Walker H, ed. *Ecology of tropical and subtropical vegetation*. Oliver & Boyd, Edinburgh, 238–265.
- Ward PR, Fillery IRP, Maharaj EA, Dunin FX.** 2003. Water budgets and nutrients in a native *Banksia* woodland and an adjacent *Medicago sativa* pasture. *Plant and Soil* **257**, 305–319.
- Wershaw R, Friedman I, Heller S, Frank P.** 1966. Hydrogen isotopic fractionation of water passing through trees. In: Hobson and Speers, ed. *Advances in Organic Geochemistry: Proceedings of the Third International Congress*. Pergamon, 55–67.
- Ytting NK.** 2015. Genetic variation in deep root growth of North-European winter wheat.
- Zhang J, Davies WJ.** 1990*a*. Does ABA in the xylem control the rate of leaf growth in soil-dried maize and sunflower plants? *Journal of Experimental Botany* **41**, 1125–1132.
- Zhang J, Davies WJ.** 1990*b*. Changes in the concentration of ABA in xylem sap as a function of changing soil water status can account for changes in leaf conductance and growth. *Plant, Cell and Environment* **13**, 277–285.
- Zhu J, Brown KM, Lynch JP.** 2010. Root cortical aerenchyma improves the drought tolerance of maize (*Zea mays* L.). *Plant, Cell and Environment* **33**, 740–749.

**Zipper S, J Q, Kucharik C.** 2016. Drought effects on US maize and soybean production: spatiotemporal patterns and historical changes. *Environmental Research Letters* **11**, 094021.



Table 1: Main characteristics of the soil used in the rhizotrons

| Depth (m) | Organic matter <sup>1</sup><br>(%) | Clay (%)<br><0.002 mm | Silt (%)<br>0.002-0.02 mm | Fine sand (%)<br>0.02-0.2 mm | Coarse sand (%)<br>0.2-2.0 mm | pH <sup>2</sup> |
|-----------|------------------------------------|-----------------------|---------------------------|------------------------------|-------------------------------|-----------------|
| 0.00-0.25 | 2.0                                | 8.7                   | 8.6                       | 46.0                         | 35.0                          | 6.8             |
| 0.25-4.00 | 0.2                                | 10.3                  | 9.0                       | 47.7                         | 33.0                          | 7.5             |

<sup>1</sup> Assuming that organic matter contains 58.7% carbon.

<sup>2</sup> pH = Reaction Number (Rt) – 0.5. Measured in a 0.01 M CaCl<sub>2</sub> suspension, soil:suspension ratio 1:2.5.

Table 2: Timeline of the experiments in 2016 and 2017

|                             | 2016        | 2017         |
|-----------------------------|-------------|--------------|
| Sowing                      | May 2015    | 11 April     |
| Transplanting               | 29 February | 3 May        |
| Onset of drying out         | 26 June     | 13 July      |
| H <sup>2</sup> tracer study | 19-25 July  | 15-21 August |
| Water uptake calculations   | 24-27 July  | 17-21 August |
| Harvest                     | 28 July     | 11 September |

Figure 1: The rhizotron facility, consisting of 12 columns of 4 m height each divided into an east- and a west-facing chamber. See text for a detailed description.

Figure 2: Biomass harvested 28 July 2016 and 11 September 2017 in the well-watered (WW) and drought stressed (DS) chicory sole crop treatments, and the chicory intercropping treatments with ryegrass and black medic respectively. Error bars denote standard errors, and letters indicate significant differences in a mixed effects one-way ANOVA. Separate analyses were made for each year.

Figure 3: Root intensity in the well-watered (WW) and drought stressed (DS) chicory sole crop treatments and in the chicory intercropping treatment with ryegrass and black medic respectively in (A) 21 June 2016, (B) 18 July 2016, (C) 6 July 2017, (D) 16 August 2017 and (E) 12 September 2017, corresponding to the time of drought initiation in the DS treatment, 2H tracer injection and for 2017, harvest. Letters indicate significant differences among treatments in the given depth in a mixed effects two-way ANOVA (i.e. depth is included as a factor in the model, but pairwise comparisons are made depth wise). In depths without letters, none of the treatments differed significantly. To meet assumptions of normality, depths where at least one of the treatments had no roots in any of the replicates, were excluded from the model, indicated by the depths below the dashed lines. Separate analyses were made for each date. Arrows indicate the depth of TDR sensors and 2H tracer injection. SE are left out to ensure readability.

Figure 4: Difference in soil volumetric water content from field capacity in 0.5 and 1.7 m in 2016 in the well-watered (WW) and drought stressed (DS) chicory sole crop treatments. Line segments represent the outcome of a three-way ANCOVA on the time interval from 24 to 27 July. The slope of the segments gives the daily decrease in volumetric water content and is interpreted as daily plant water uptake. See also Figure 6.

Figure 5: Difference in soil volumetric water content from field capacity in 0.5 and 2.3 m in 2017 in the well-watered (WW) and drought stressed (DS) chicory sole crop treatments and in the chicory intercropping treatment with ryegrass and black medic respectively. Line segments represent the

outcome of a three-way ANCOVA on the time interval from 17 to 21 August. The slope of the segments gives the daily decrease in volumetric water content and is interpreted as daily plant water uptake. See also Figure 6.

Figure 6: Mean daily decrease in soil volumetric water content in 0.5 and 1.7 m 24 to 28 July 2016 and 0.5 and 2.3 m 17 to 21 August 2017 in the well-watered (WW) and drought stressed (DS) chicory sole crop treatments and in the chicory intercropping treatment with ryegrass and black medic respectively. All days included. The daily decrease in volumetric water content is interpreted as daily plant water uptake. Error bars denote standard errors, and letters indicate significant differences among treatments in a three-way ANCOVA, with depth and treatment as factors and time as covariate. Separate analyses were made for each year.

Figure 7:  $^2\text{H}$  concentration in transpiration water before and after application of tracer in 2.3 m in (A) 2016 and (B) 2017 in the well-watered (WW) and drought stressed (DS) chicory sole crop treatments and in the chicory intercropping treatment with ryegrass and black medic respectively. We tested significant differences in a mixed effects two-way ANOVA. To meet the assumptions of homoscedasticity data was log-transformed. Separate analyses were made for each year and pairwise comparisons were only made for the last date. There was no effect of treatment in 2016. In 2017, the  $^2\text{H}$  concentration in chicory and in black medic in the intercropping treatment differed. Likewise in the chicory and ryegrass intercropping. Differing treatments are marked with identical symbols.

Figure 8:  $^{13}\text{C}$  concentration in chicory harvested 28 July 2016 and 11 September 2017 in the well-watered (WW) and drought stressed (DS) chicory sole crop treatments and in the chicory intercropping treatment with ryegrass and black medic respectively. Error bars denote standard errors, and letters indicate significant differences among treatments in a one-way ANOVA. Separate analyses were made for each year. For 2017, the model is a mixed effects model because samples for each plant in a chamber were analysed separately.

Figure 1

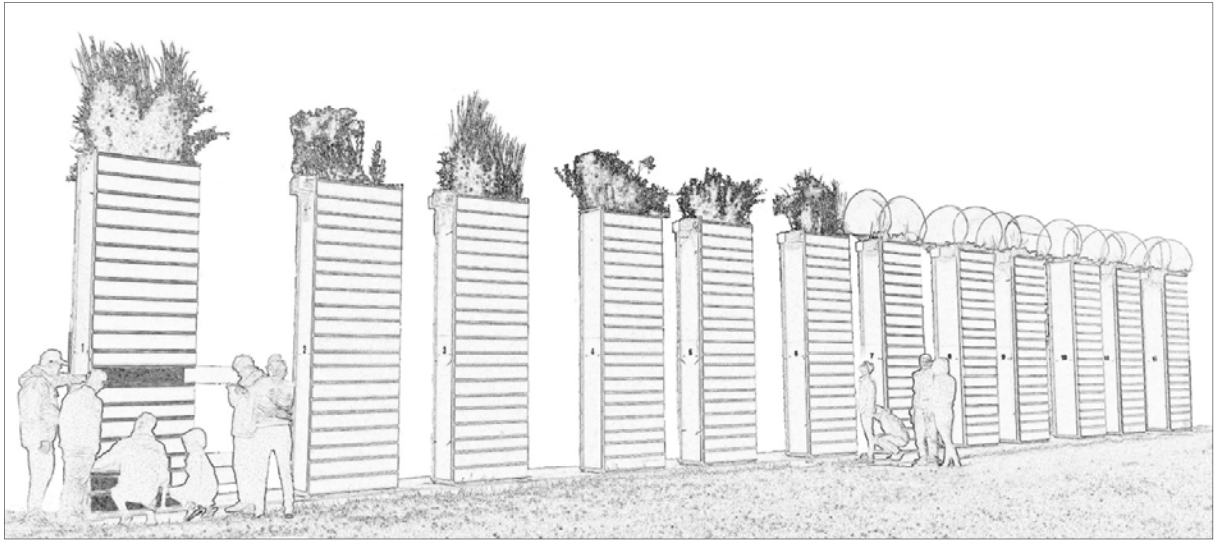

Figure 2

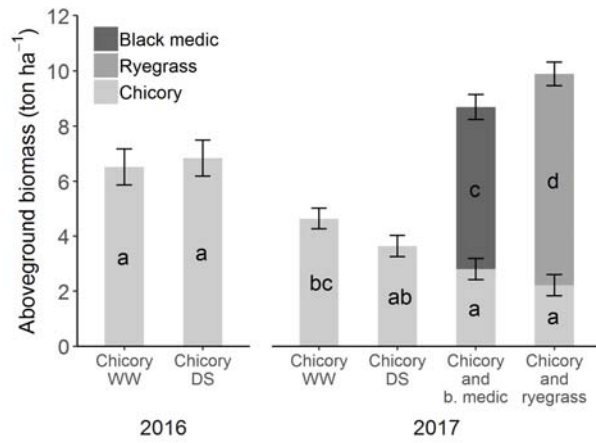

Figure 3

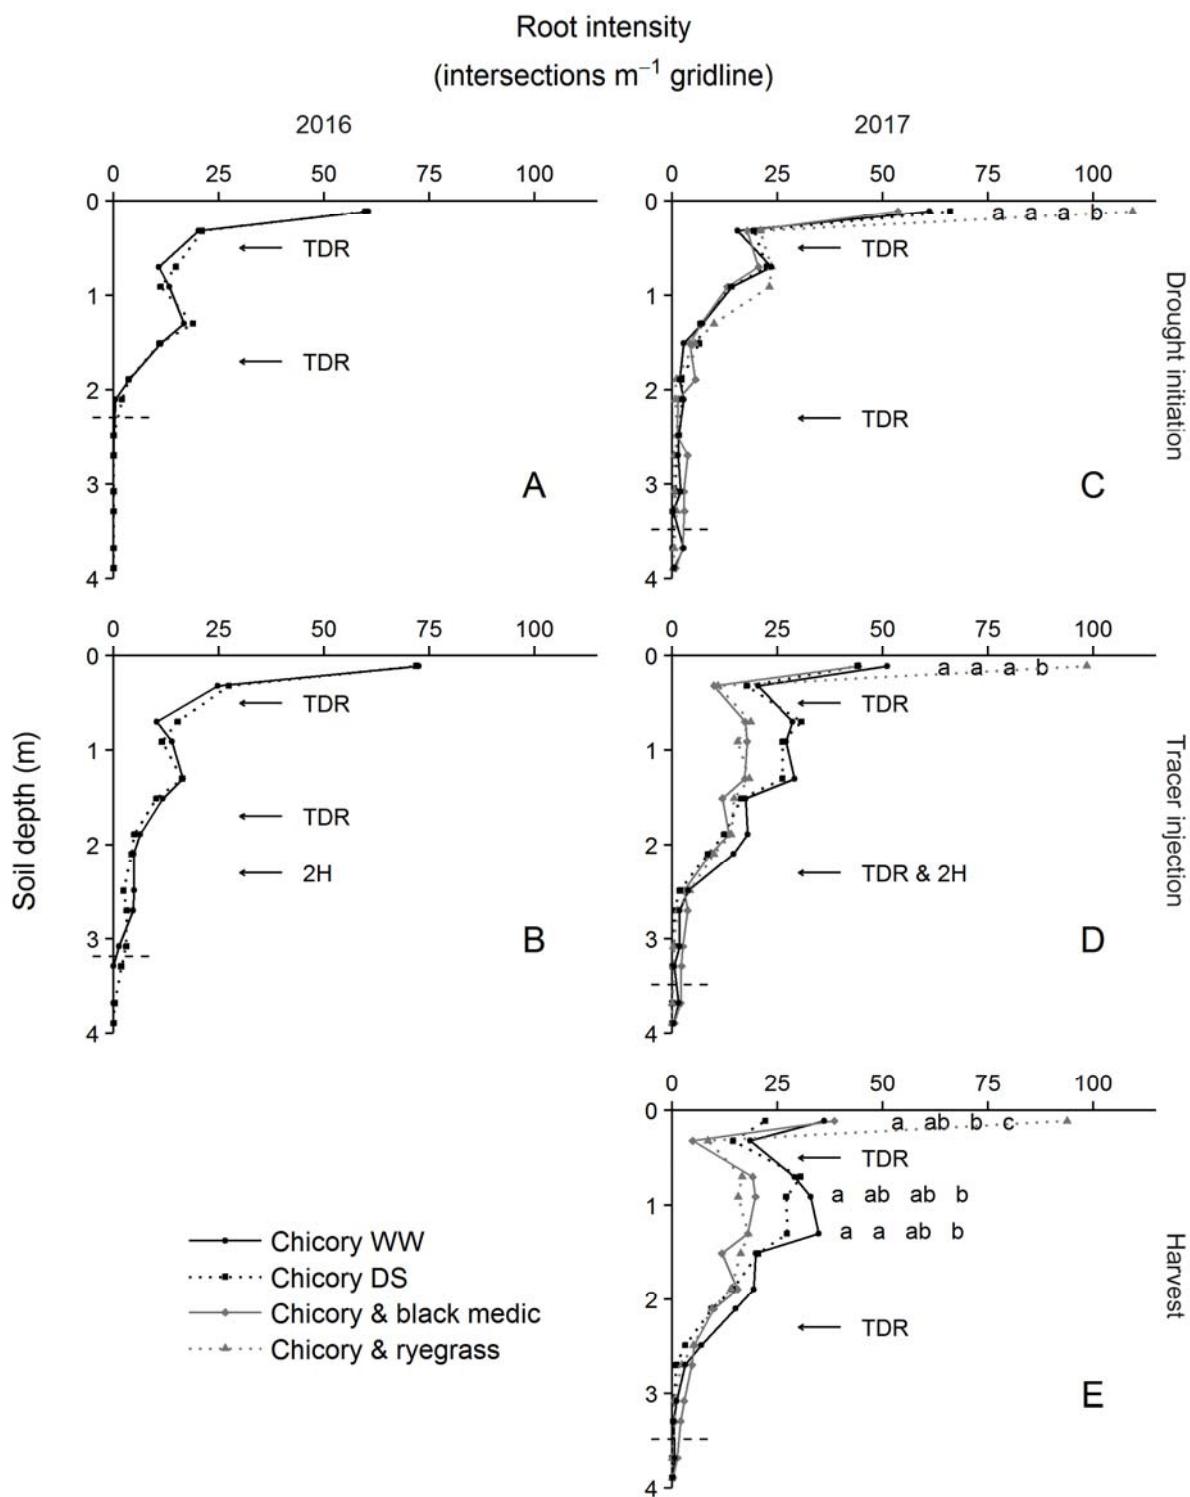

Figure 4

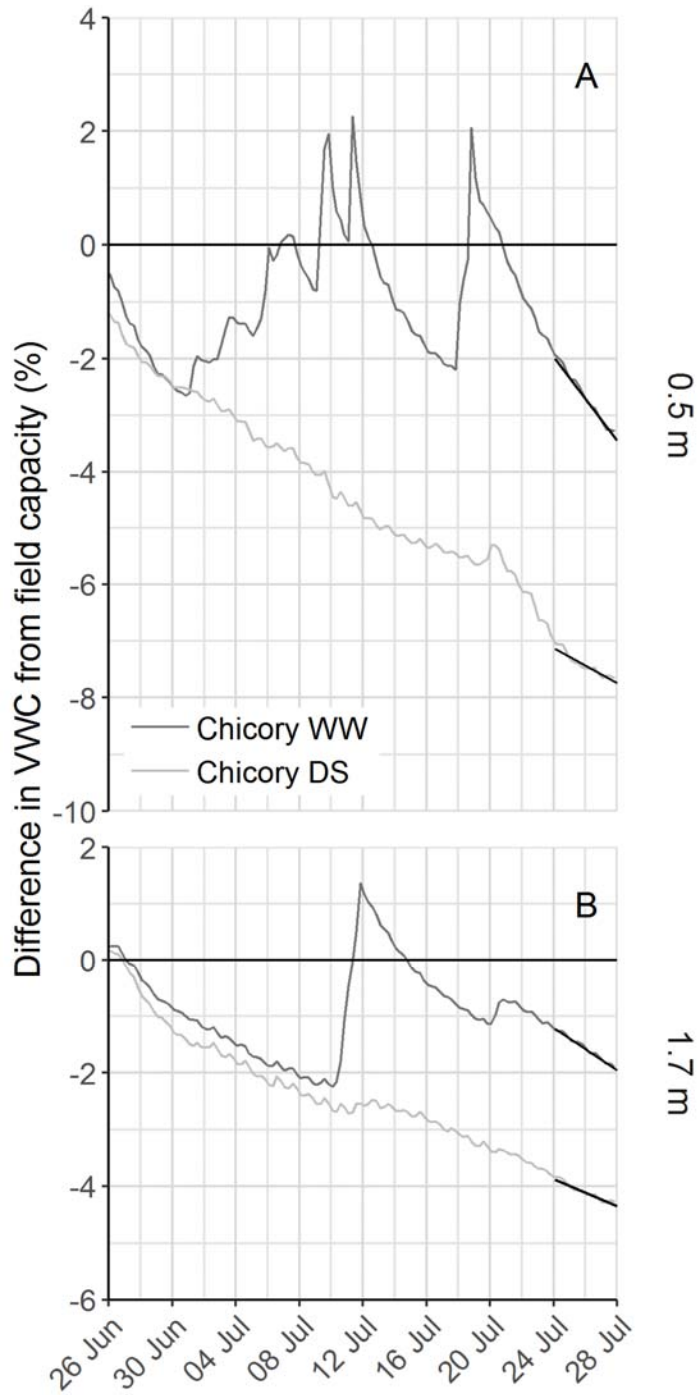



Figure 5

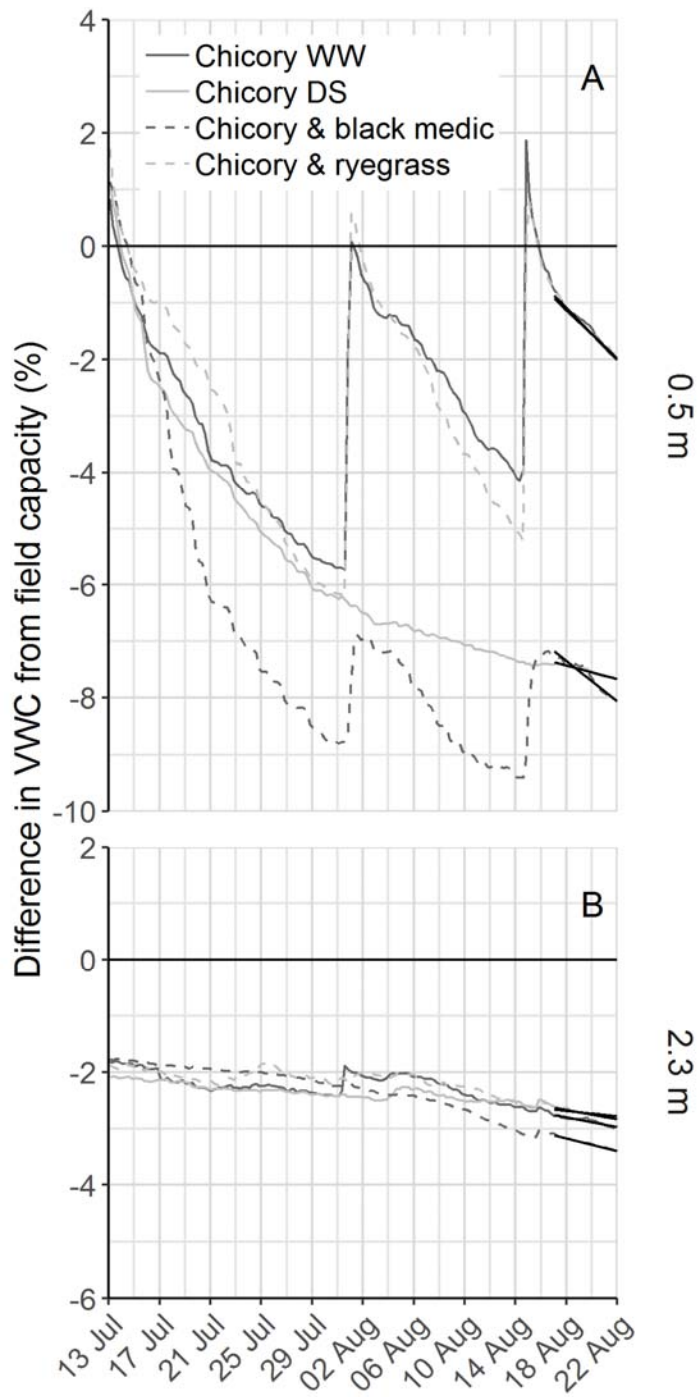

Figure 6

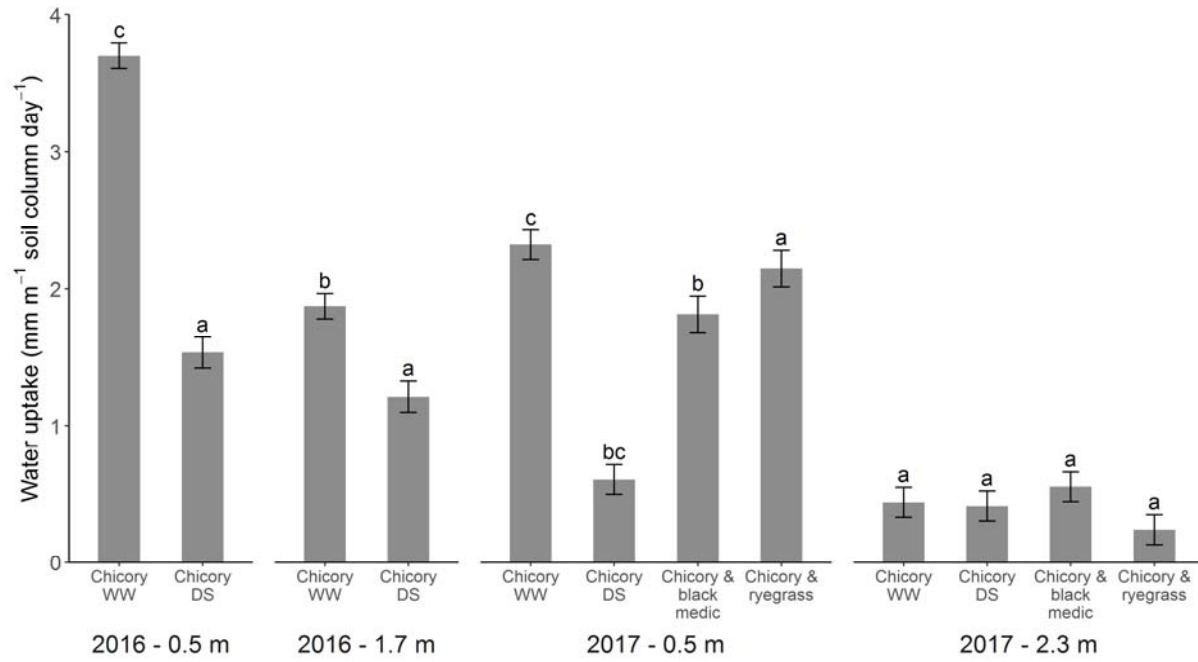

Figure 7

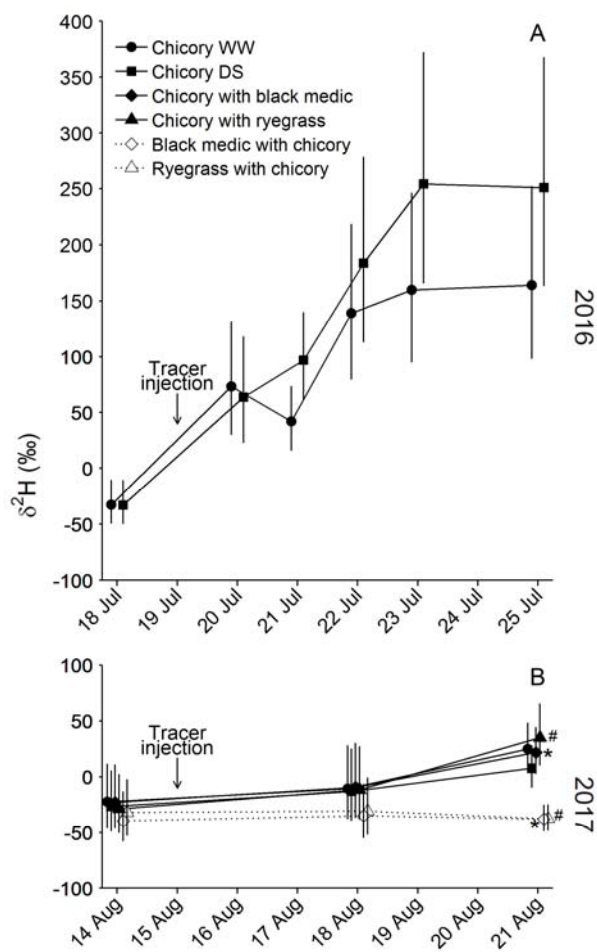

Figure 8

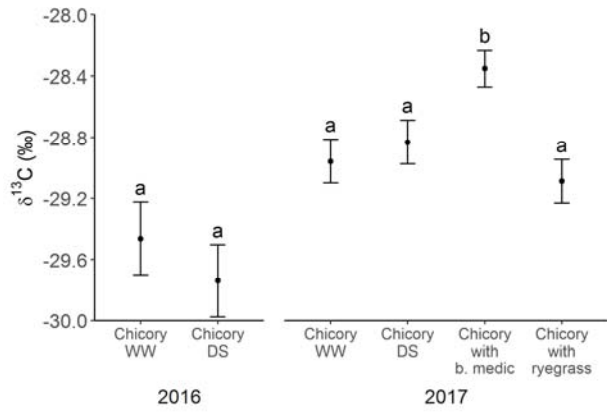



bioRxiv preprint doi: <https://doi.org/10.1101/184900>; this version posted December 13, 2018. The copyright holder for this preprint (which was not certified by peer review) is the author/funder, who has granted bioRxiv a license to display the preprint in perpetuity. It is made available under aCC-BY-NC-ND 4.0 International license.

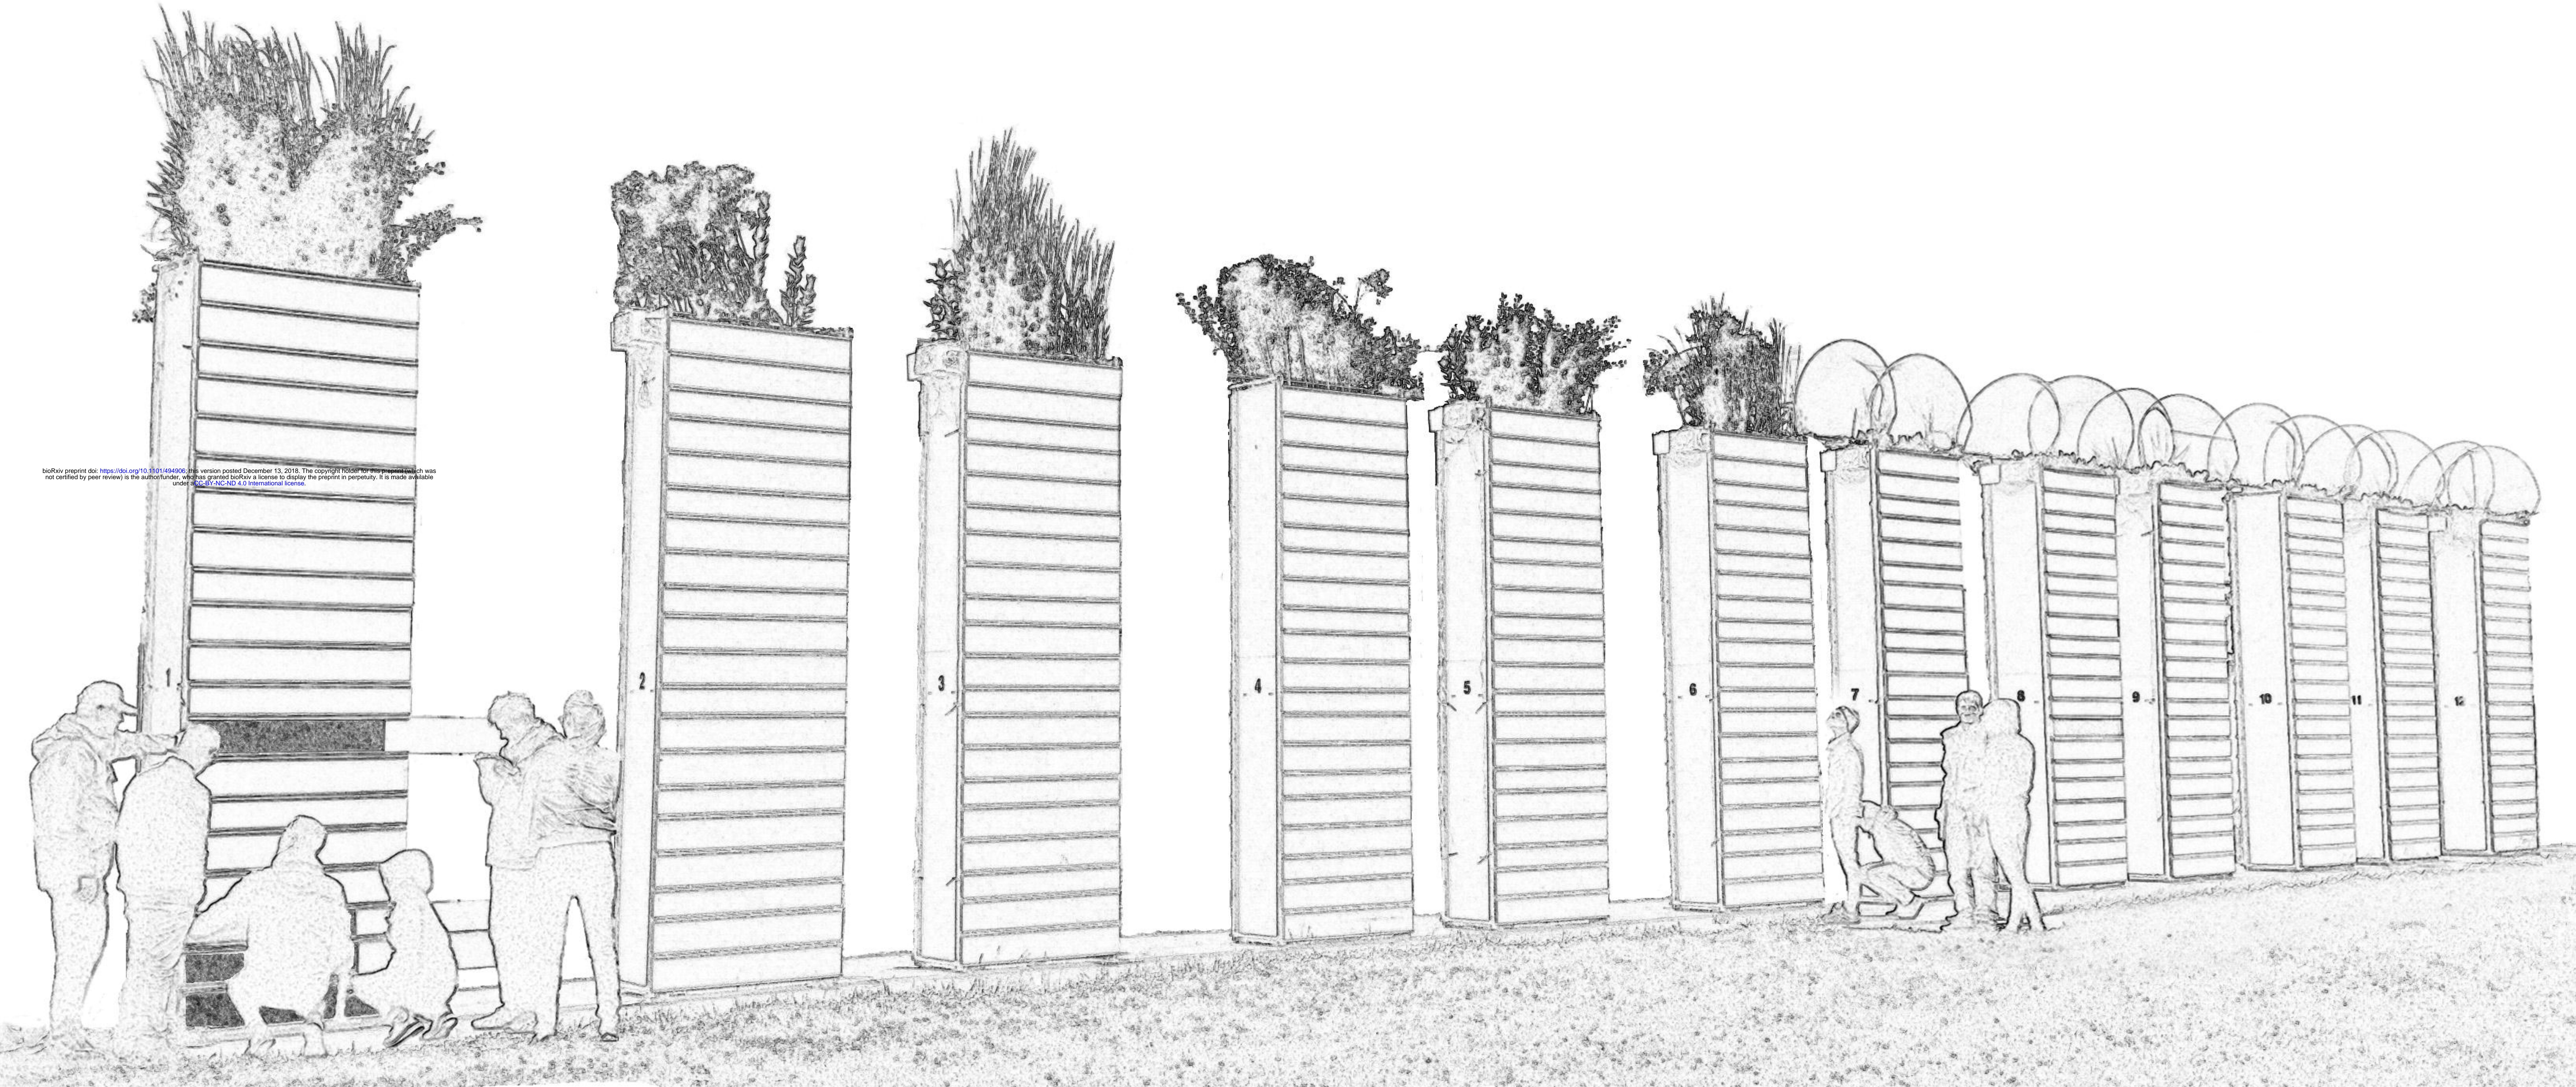



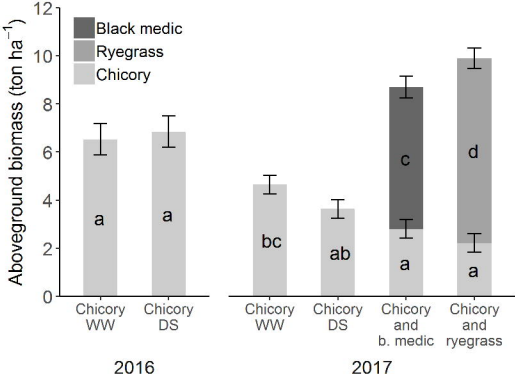

Root intensity  
(intersections m<sup>-1</sup> gridline)

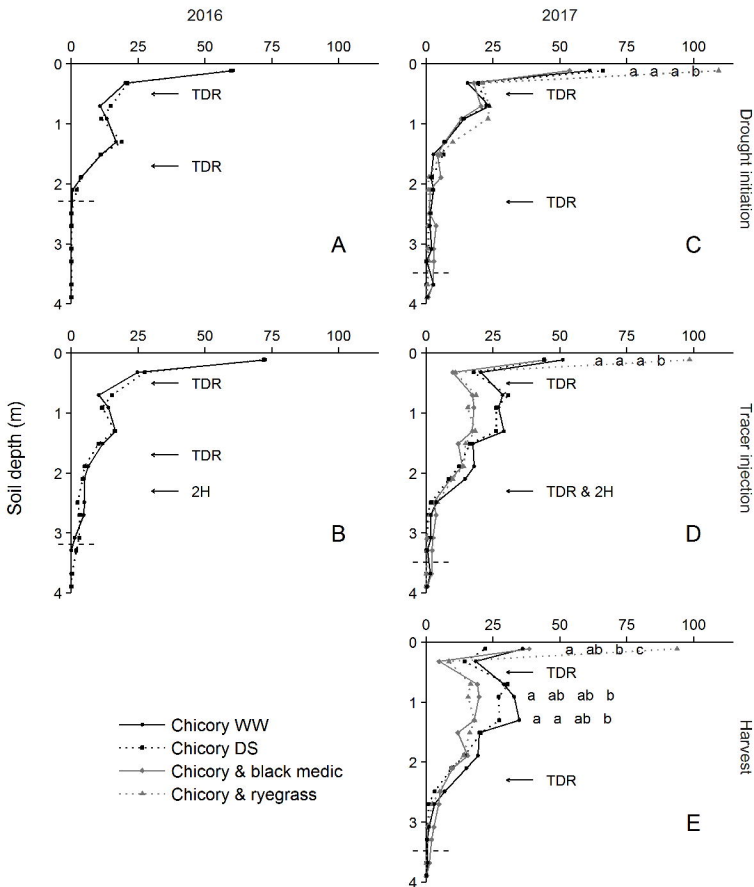

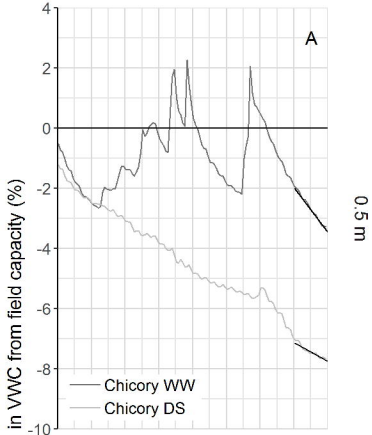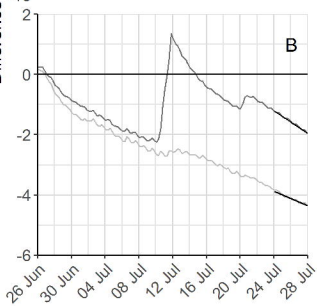



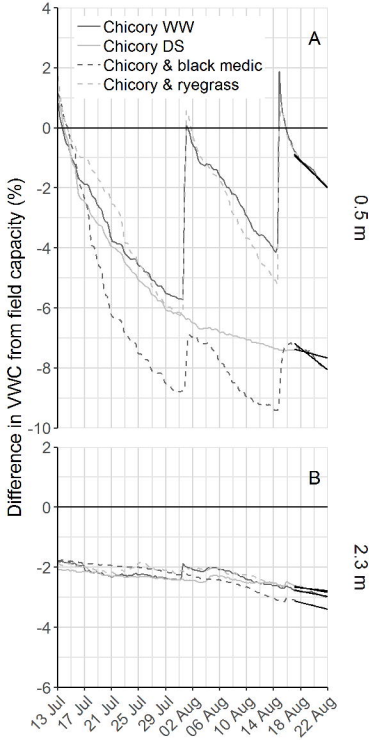

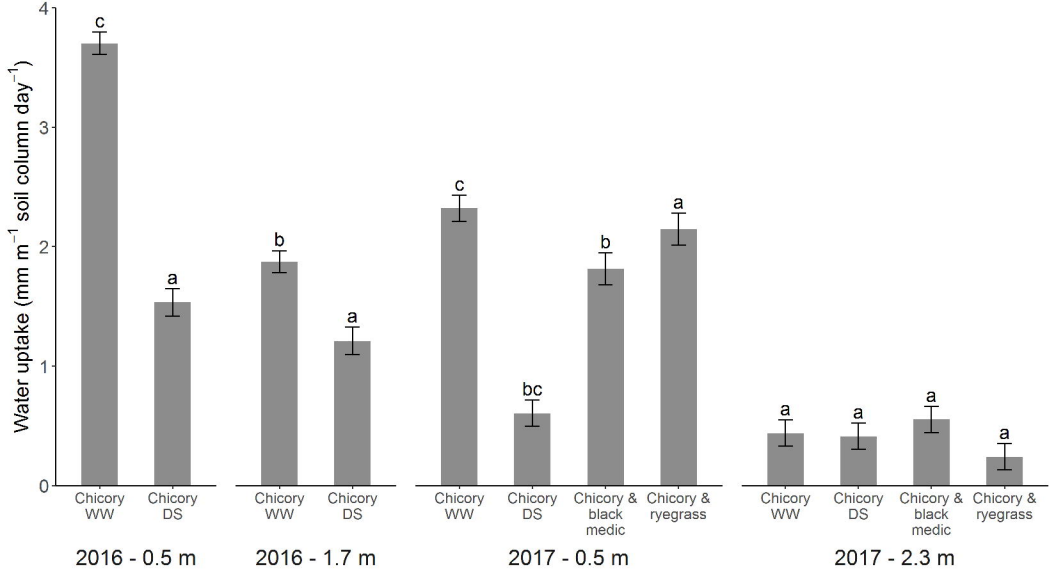

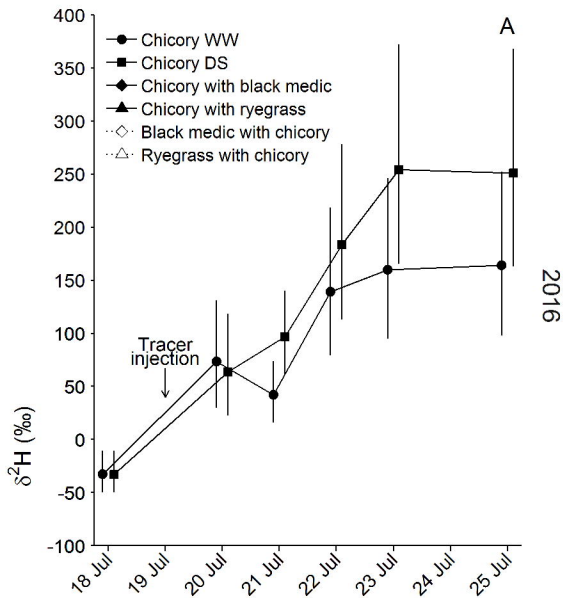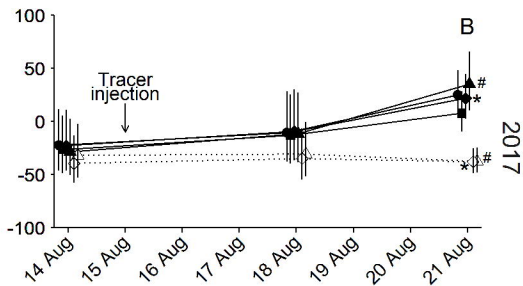

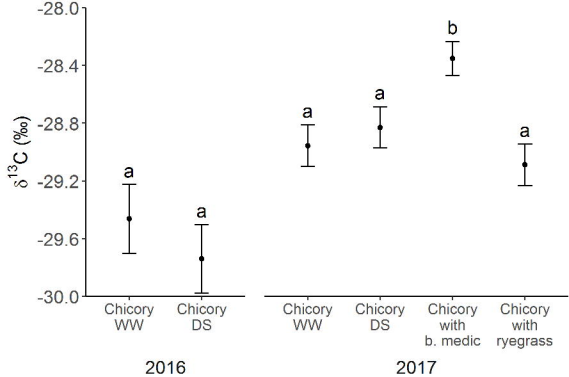

Source: http://biorxiv.org/content/10.1101/494906v1.full.pdf
